# Supplementary material
Source: PubMed Central journal article supplement (PMC2810119)
Supplement: NIHMS155871-supplement-Sfigure.pdf [file NIHMS155871-supplement-Sfigure.pdf]

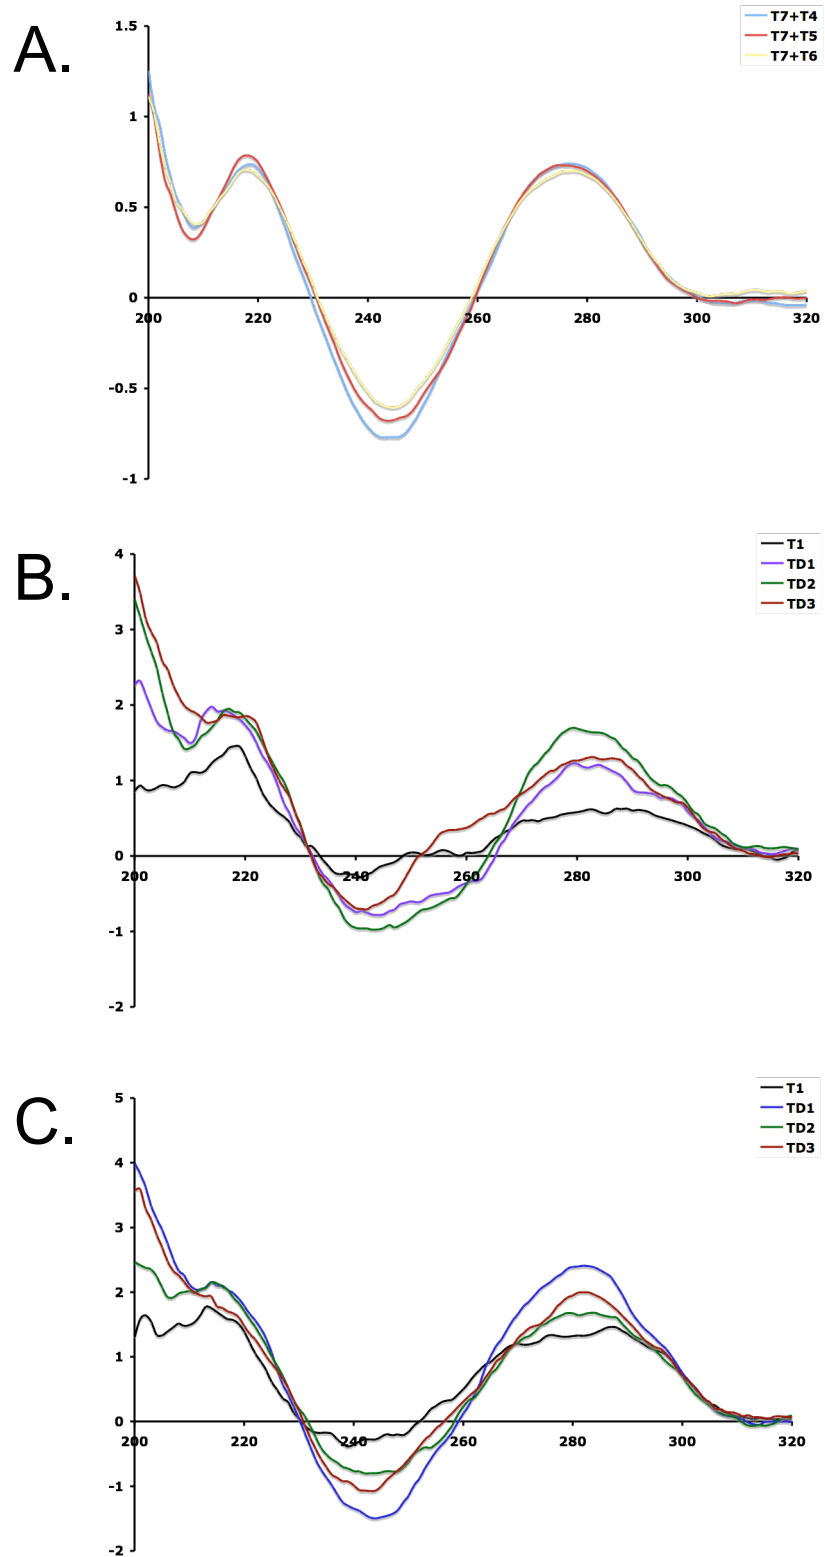

Supplemental Figure 1. Raw CD spectra of reference duplexes **T7+T4**, **T7+T5** and **T7+T6** (**A**); telomeric oligonucleotide **T1** and complexes **TD1**, **TD2** and **TD3** measured in 100 mM Na<sup>+</sup> (**B**) or in 100 mM K<sup>+</sup> (**C**) solutions at 25 °C.
